# Supplementary material for: Evaluation of a Novel Assay for Detection of the Fetal Marker RASSF1A: Facilitating Improved Diagnostic Reliability of Noninvasive Prenatal Diagnosis
Source: PubMed Central journal article supplement (PMC3443218; doi:10.1371/journal.pone.0045073), 2012-09-14

**Figure S2a:** Amplification plots showing the difference in efficiency of three methylation sensitive RASSF1A restriction enzyme digest protocols using cell free DNA extracted from the plasma of a non-pregnant female. The samples should digest completely and therefore no RASSF1A should be detected as there is no hypermethylated cell free fetal DNA present in the sample. Protocol D was the only one shown to give complete digestion.

- A. Undigested samples (Ct 23.8)
- B. Sample digested at 60°C with BstUI only (Ct 36.8) (e.g. ref 12).
- C. Sample digested at 37°C with HpaII, HhaI and EcoRI (Ct 40.3).
- D. Sample (purple line) digested at 60°C with BstUI and BstYI followed by digestion at 37°C with HpaII, HhaI and EcoRI. No amplification (purple line)

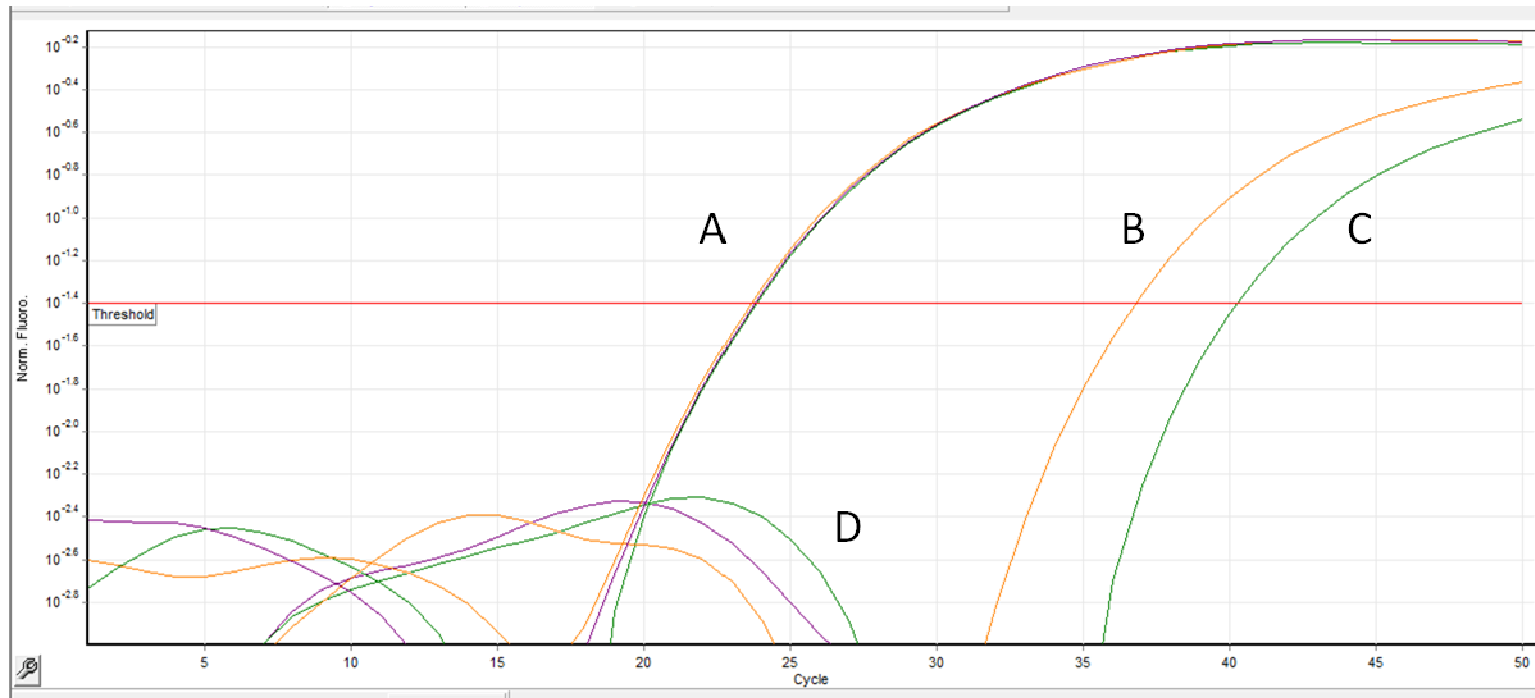

**Figure S2b:** Amplification plots showing an example of the difference in efficiency of two methylation sensitive RASSF1A restriction enzyme digest protocols using cell free DNA extracted from the same plasma sample from a pregnant female.

- A. Undigested sample (Ct 29.1)
- B. Plasma sample (red line) digested at 60°C with BstUI only (Ct 34.5)
- C. Plasma sample (purple line) digested at 60°C with BstUI and BstYI followed by digestion at 37°C with HpaII, HhaI and EcoRI (Ct 35.6)

The difference in Ct values (1.1) between protocols B and C suggest that the digestion of unmethylated RASSF1A has been less efficient with protocol B than with protocol C. The amount of detectable RASSF1A is higher using protocol B than C an interpretation of that result is that protocol B leaves some of the unmethylated RASSF1A undigested.

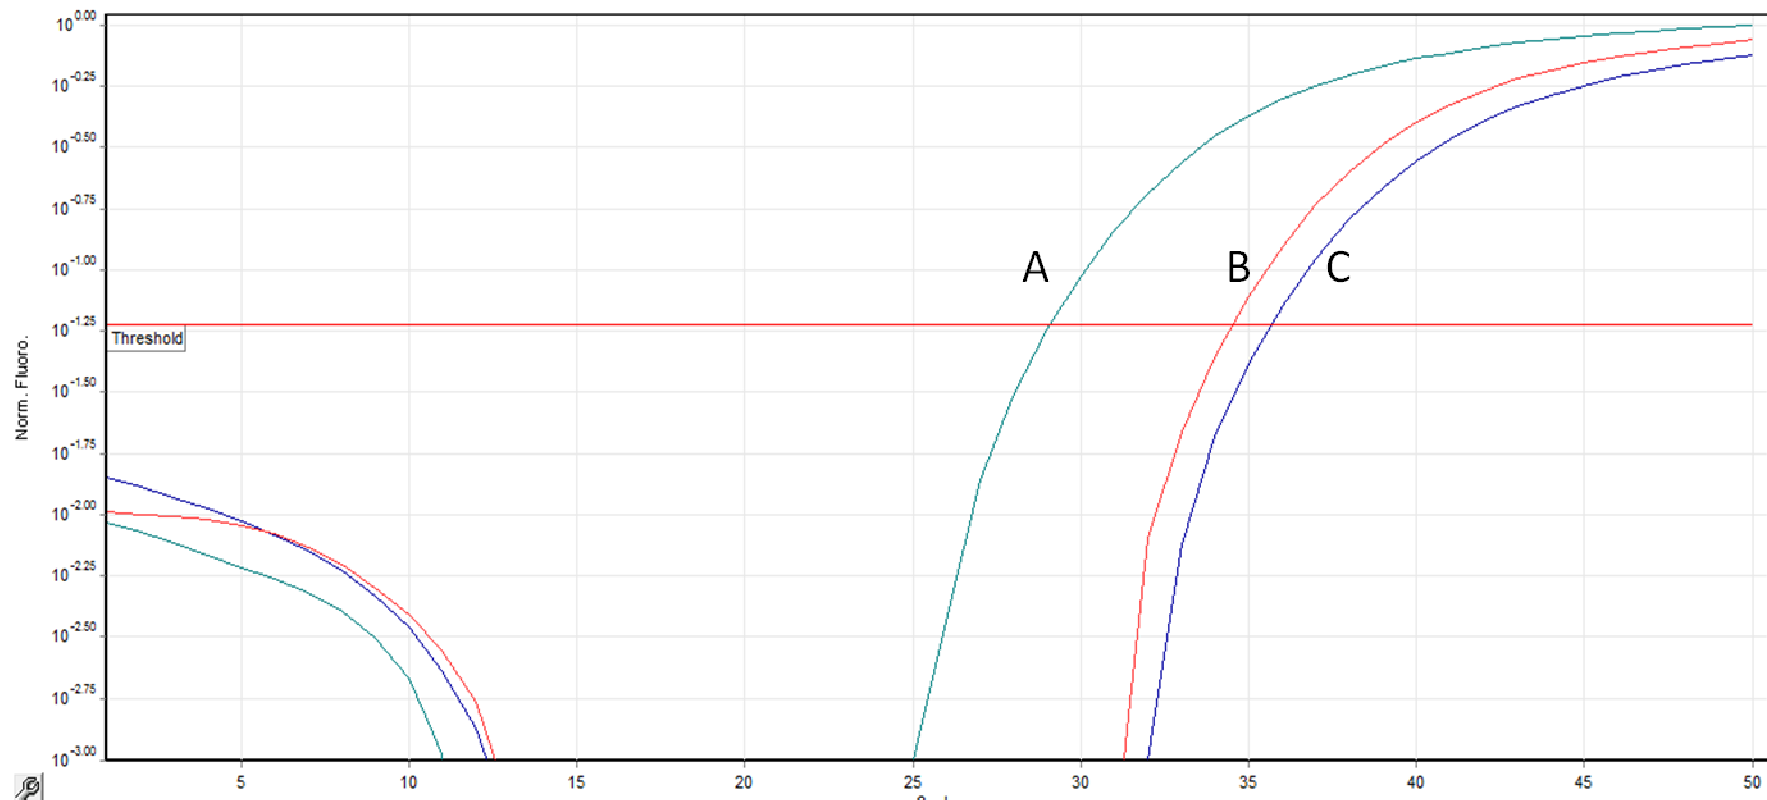

Supplement: pone.0045073.s002.pdf [file pone.0045073.s002.pdf]
